# Supplementary material for: Draft Genomes, Phylogenetic Reconstruction, and Comparative Genomics of Two Novel Cohabiting Bacterial Symbionts Isolated from Frankliniella occidentalis
Source: PubMed Central journal article supplement (PMC4558854; doi:10.1093/gbe/evv136), 2015-07-21
Supplement: supp_evv136_Suppl_Figure_1.pdf [file supp_evv136_Suppl_Figure_1.pdf]

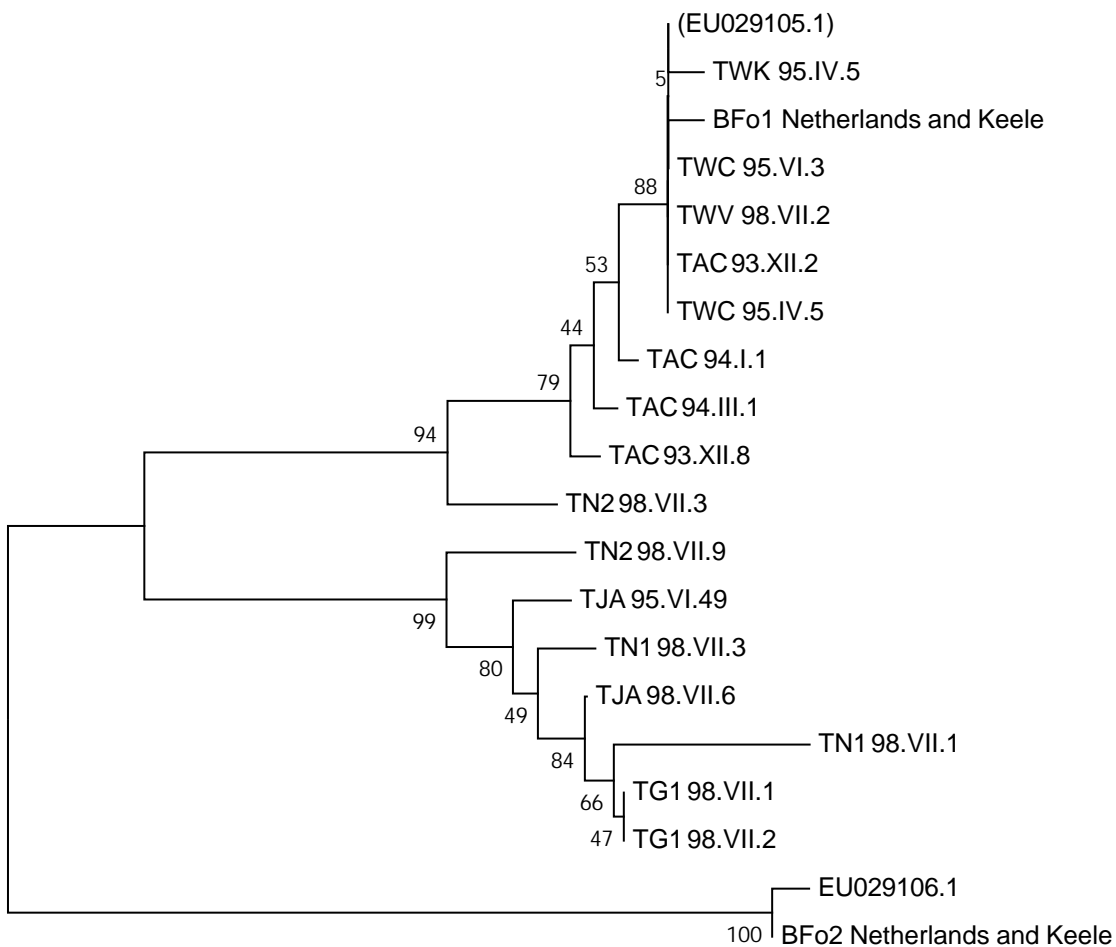

0.005
